# Supplementary material
Source: PubMed Central journal article supplement (PMC10036870)

## **Appendix**

### **Contents:**

Supplementary List 1: List of principle investigators and ethics approvals by site, page 2

Supplementary Table 1: Study hospitals resources in ABC-DO, page 3

Supplementary Table 2: Sociodemographic profile of the study sample, page 4

Supplementary Table 3: Tumour profile of the study sample, page 5

Supplementary Table 4: TNM stage and its ascertainment, page 6

Supplementary Table 5: Surgical management for localised vs locally advanced tumours, page 7

Supplementary Figure 1: Venn diagrams of treatment regimens for localised vs locally advanced tumours, page 8

Supplementary Figure 2: Indicated vs. initiated surgery, chemotherapy and endocrine therapy per population group, page 9

Supplementary Figure 3: Individual treatment journeys per population group, page 10

**Supplementary List 1:** List of principle investigators and ethics approvals by site

| Site/Institution (ethics approval)                                            | PI                   | No. non-metastatic breast cancer patients included in the present analysis |
|-------------------------------------------------------------------------------|----------------------|----------------------------------------------------------------------------|
| University of Witwatersrand (M150345), Gauteng, South Africa                  | H. Cubasch, M. Joffe | 578                                                                        |
| Ministry of Health and Social Services of Namibia (17/3/3)                    | A. Zietsman          | 400                                                                        |
| Abia State University Teaching Hospital (ABSUTH), Nigeria                     | C. Adisa, S. Offiah  | 110                                                                        |
| Federal Medical Centre Owerri, Nigeria                                        | A. Anele             | 182                                                                        |
| Uganda National Council for Science and Technology (HS 1588), Uganda          | M. Galudande         | 296                                                                        |
| University of Zambia Biomedical Research Ethics Committee (004-08-15), Zambia | G. Parham            | 150                                                                        |
| IARC (IEC13-19, IEC15-18)                                                     | V. McCormack         | -                                                                          |
| LSHTM (6459)                                                                  | I. dos Santos Silva  | -                                                                          |

**Supplementary Table 1: Public tertiary study/recruitment hospitals in ABC-DO and available diagnostic and therapeutic resources**

| Country                                | Namibia                                           | Nigeria                                      | South Africa                                     | Uganda                                            | Zambia <sup>A</sup>                               |
|----------------------------------------|---------------------------------------------------|----------------------------------------------|--------------------------------------------------|---------------------------------------------------|---------------------------------------------------|
| <b>Location</b>                        | Windhoek Central Hospital, AB May Oncology Centre | FMC Owerri, ABSUTH and Maranatha clinic, Aba | Chris Hani Baragwanath Academic Hospital, Soweto | Mulago hospital, Uganda Cancer Institute, Kampala | Cancer Diseases Hospital, Lusaka & Kabwe Hospital |
| <b>Catchment population</b>            | National (to 1000 km)                             | Local                                        | Soweto ± 50 km                                   | National (to 600 km)                              | provincial and national                           |
| <b>Health facility: System level</b>   | Tertiary Public                                   | NA Public                                    | Tertiary Public                                  | Tertiary Public                                   | Sec/Tertiary Public                               |
| <b>Health facility: Sector</b>         |                                                   |                                              |                                                  |                                                   |                                                   |
| <b>Treatment costs</b>                 | Free/minimal                                      | Out-of-pocket                                | Free/minimal                                     | Out-of-pocket                                     | Out-of-pocket                                     |
| <b>Diagnostic work-up</b>              |                                                   |                                              |                                                  |                                                   |                                                   |
| <b>Imaging</b>                         |                                                   |                                              |                                                  |                                                   |                                                   |
| Ultrasound                             | Free                                              | 5,000NGN / 12 USD                            | Free                                             | Out-of-pocket                                     | K50 / 3 USD                                       |
| Mammography                            | Free                                              | 10,000NGN /24 USD                            | Free                                             | Out-of-pocket                                     | K250 / 15 USD                                     |
| Computer Tomography                    | Free                                              | 80,000NGN /195 USD                           | Free                                             | Out-of-pocket                                     | K900 / 56 USD                                     |
| MRI                                    | Free                                              | 120,000NGN /290 USD                          | Free                                             | Out-of-pocket                                     | K1800 / 112 USD                                   |
| Bone Scan                              | Free                                              | 4,000NGN /10 USD                             | Free                                             | Not available                                     | Not Available                                     |
| <b>Biopsy</b>                          | Free                                              | 40,000NGN / 100 USD                          | Free                                             | free                                              | K320 / 20 USD                                     |
| <b>Fine Needle Aspiration Cytology</b> | Free                                              | 40,000NGN / 100 USD                          | Free                                             | Free                                              | K300 / 19 USD                                     |
| <b>Receptor testing</b>                |                                                   | 42,000NGN / 100 USD                          |                                                  |                                                   | Not available                                     |
| Oestrogen/Progesterone                 | Free                                              | X                                            | Free                                             | Out-of-pocket                                     | Not available                                     |
| HER2                                   | Free                                              | X                                            | Free                                             | Out-of-pocket                                     | Not available                                     |
| FISH                                   | Free                                              | X                                            | Free                                             | Out-of-pocket                                     | Not available                                     |
| <b>Full blood tests</b>                | Free                                              | 3,000NGN / 7 USD                             | Free                                             | free                                              | K50 / 3 USD                                       |
| <b>ECG</b>                             | Free                                              | 32,000NGN / 80 USD                           | Free                                             | Out-of-pocket                                     | K50 / 3 USD                                       |
| <b>Treatment</b>                       |                                                   |                                              |                                                  |                                                   |                                                   |
| <b>Surgery</b>                         |                                                   |                                              |                                                  |                                                   |                                                   |
| Mastectomy                             | Free                                              | 120,000NGN / 290 USD                         | Free                                             | free                                              | free                                              |
| Lumpectomy / Wide local excision       | Free                                              | 45,000NGN / 110 USD                          | Free                                             | Free                                              | free                                              |
| <b>Systemic therapy</b>                |                                                   |                                              |                                                  |                                                   |                                                   |
| Pre-chemotherapy tests                 | Free                                              | ~15,000NGN / 35 USD                          | Free                                             | free                                              | free                                              |
| <b>Chemotherapy drugs</b>              |                                                   |                                              |                                                  |                                                   |                                                   |
| Cyclophosphamide                       | Free                                              | ~125,000NGN / 300 USD                        | Free                                             | Free when in stock                                | free                                              |
| Anthracycline                          | Free                                              | ~ 136,000NGN / 330 USD                       | Free                                             | Free when in stock                                | free                                              |
| 5-Fluorouracil                         | Free                                              | ~10,000NGN /24 USD                           | Free                                             | Free when in stock                                | free                                              |
| Methotrexate                           | Free                                              | ~60,000NGN / 144 USD                         | Free                                             | Free when in stock                                | free                                              |
| Taxane                                 | Free                                              | ~ 80,000NGN /190 USD                         | Free                                             | Free when in stock                                | free                                              |
| Platinum-based drugs                   | Free                                              | --                                           | Free                                             | Free when in stock                                | free                                              |
| <b>Hormonal therapy</b>                |                                                   |                                              |                                                  |                                                   |                                                   |
| Tamoxifen                              | Free                                              | ~14,000NGN / 35 USD                          | Free                                             | Free when in stock                                | free when in stock                                |
| Aromatase inhibitors                   | Free                                              | ~ 84,000NGN /200 USD                         | Free                                             | Out-of-pocket                                     | free                                              |
| <b>Trastuzumab</b>                     | Free                                              | ~4.8M NGN / 11550 USD                        | Free                                             | Out-of-pocket                                     | free                                              |
| <b>Radiotherapy machine</b>            |                                                   | ~500,000NGN / 1200 USD                       |                                                  |                                                   | free                                              |
| Cobalt 60                              | Free                                              | X                                            | Free <sup>B</sup>                                | Out-of-pocket                                     | free                                              |
| Linear accelerator                     | Free                                              | --                                           | Free <sup>B</sup>                                | Out-of-pocket                                     | free                                              |

<sup>A</sup> Mammography is not being done at CDH or UTH. Patients have to have it done privately. IHCs : ER, PR, HER2, Ki67 are not done in the public institutions. Patients have to have it done privately at their own cost. With the introduction of the National Health Insurance Management authority (NHIMA), all the investigation listed in the table above (except IHCs) are done without any additional cost to the patients. The patient pays monthly subscription of K60 to access NHIMA services. NHIMA also [provides contrast for imaging through its accredited pharmacies. Hormone Therapy is free when available in the hospital. When out of stock in the hospital, patients collect from NHIMA accredited pharmacies;

<sup>B</sup> Not operational on repeated occasions in Uganda

**Supplementary Table 2: Sociodemographic profile of non-metastatic women with known stage information in the African Breast Cancer-Disparities in Outcomes (ABC-DO) cohort**

|                                                 | Namibia<br>black                     | Namibia<br>non-black | Nigeria        | South<br>Africa<br>black | South Africa<br>non-black | Uganda          | Zambia         | Total          |
|-------------------------------------------------|--------------------------------------|----------------------|----------------|--------------------------|---------------------------|-----------------|----------------|----------------|
| Number of women                                 | N=309                                | N=91                 | N=292          | N=544                    | N=34                      | N=296           | N=150          | N=1716         |
|                                                 | N (column %) unless stated otherwise |                      |                |                          |                           |                 |                |                |
| Age in years (mean (SD))                        | 52.2 (15.1)                          | 57.3 (12.2)          | 49.2 (12.2)    | 54.8 (14.6)              | 53.5 (15.0)               | 48.1 (12.5)     | 51.7 (14.1)    | 52 (14.1)      |
| Symptom duration, months (median (IQR))         | 5.7 (2.1-14.9)                       | 1.4 (0.4-4.8)        | 5.1 (2.7-11.8) | -                        | -                         | 11.7 (5.8-24.7) | 8.3 (2.8-20.3) | 7.0 (2.5-17.6) |
| Socioeconomic position <sup>A</sup>             |                                      |                      |                |                          |                           |                 |                |                |
| Low                                             | 132 (42.7)                           | 0 (0)                | 130 (44.5)     | 279 (51.3)               | 13 (38.2)                 | 167 (56.4)      | 48 (32.0)      | 769 (44.8)     |
| Medium                                          | 110 (35.6)                           | 37 (40.7)            | 121 (41.4)     | 171 (31.4)               | 7 (20.6)                  | 64 (21.6)       | 53 (35.3)      | 563 (32.8)     |
| High                                            | 67 (21.7)                            | 54 (59.3)            | 41 (14.0)      | 91 (16.7)                | 14 (41.2)                 | 65 (22.0)       | 49 (32.7)      | 381 (22.2)     |
| Education                                       |                                      |                      |                |                          |                           |                 |                |                |
| tertiary                                        | 49 (15.9)                            | 36 (39.6)            | 103 (35.3)     | 105 (19.3)               | 12 (35.3)                 | 39 (13.2)       | 35 (23.3)      | 379 (22.1)     |
| <tertiary                                       | 260 (84.1)                           | 55 (60.4)            | 189 (64.7)     | 370 (68.0)               | 20 (58.8)                 | 257 (86.8)      | 115 (76.7)     | 1266 (73.8)    |
| missing                                         | 0 (0.0)                              | 0 (0)                | 0 (0.0)        | 69 (12.7)                | 2 (5.9)                   | 0 (0.0)         | 0 (0.0)        | 71 (4.1)       |
| Relationship <sup>B</sup>                       |                                      |                      |                |                          |                           |                 |                |                |
| Married                                         | 104 (33.7)                           | 53 (58.2)            | 201 (68.8)     | 205 (37.7)               | 18 (52.9)                 | 147 (49.7)      | 83 (55.3)      | 811 (47.3)     |
| Not married                                     | 205 (66.3)                           | 38 (41.8)            | 91 (31.2)      | 336 (61.8)               | 16 (47.1)                 | 149 (50.3)      | 67 (44.7)      | 902 (52.6)     |
| Residency <sup>C</sup>                          |                                      |                      |                |                          |                           |                 |                |                |
| Urban                                           | 183 (59.2)                           | 84 (92.3)            | 185 (63.4)     | 320 (58.8)               | 21 (61.8)                 | 81 (27.4)       | 102 (68.0)     | 976 (56.9)     |
| Rural                                           | 126 (40.8)                           | 7 (7.7)              | 107 (36.6)     | 224 (41.2)               | 13 (38.2)                 | 215 (72.6)      | 48 (32.0)      | 740 (43.1)     |
| HIV <sup>D</sup>                                |                                      |                      |                |                          |                           |                 |                |                |
| HIV-/not known                                  | 262 (84.8)                           | 89 (97.8)            | 286 (97.9)     | 400 (73.5)               | 31 (91.2)                 | 263 (88.9)      | 127 (84.7)     | 1458 (85.0)    |
| HIV +                                           | 47 (15.2)                            | 2 (2.2)              | 6 (2.1)        | 144 (26.5)               | 3 (8.8)                   | 33 (11.1)       | 23 (15.3)      | 258 (15.0)     |
| Pre-existing non-HIV comorbidities <sup>E</sup> |                                      |                      |                |                          |                           |                 |                |                |
| No                                              | 159 (51.5)                           | 32 (35.2)            | 67 (22.9)      | 224 (41.2)               | 12 (35.3)                 | 204 (68.9)      | 92 (61.4)      | 790 (46.1)     |
| Minor problems                                  | 103 (33.3)                           | 35 (38.5)            | 139 (47.6)     | 114 (21.0)               | 9 (26.5)                  | 72 (24.3)       | 50 (33.3)      | 522 (30.4)     |
| Major Problems                                  | 47 (15.2)                            | 24 (26.4)            | 86 (29.5)      | 110 (20.2)               | 7 (20.6)                  | 20 (6.8)        | 8 (5.3)        | 302 (17.6)     |
| missing                                         | 0 (0.0)                              | 0 (0.0)              | 0 (0.0)        | 96 (17.6)                | 6 (17.6)                  | 0 (0.0)         | 0 (0.0)        | 102 (5.9)      |
| BMI (kg/m <sup>2</sup> )                        |                                      |                      |                |                          |                           |                 |                |                |
| <18.5                                           | 29 (9.4)                             | 2 (2.2)              | 12 (4.1)       | 8 (1.5)                  | 2 (5.9)                   | 7 (2.4)         | 5 (3.3)        | 65 (3.8)       |
| 18.5 to <25                                     | 106 (34.3)                           | 28 (30.8)            | 109 (37.3)     | 101 (18.6)               | 7 (20.6)                  | 122 (41.2)      | 53 (35.4)      | 526 (30.6)     |
| 25 to <30                                       | 80 (25.9)                            | 18 (19.8)            | 86 (29.5)      | 107 (19.7)               | 10 (29.4)                 | 118 (39.9)      | 41 (27.3)      | 460 (26.8)     |
| ≥ 30                                            | 85 (27.5)                            | 39 (42.8)            | 74 (25.3)      | 295 (54.2)               | 10 (29.4)                 | 44 (14.9)       | 36 (24.0)      | 583 (34.0)     |
| missing                                         | 9 (2.9)                              | 4 (4.4)              | 11 (3.8)       | 33 (6.0)                 | 5 (14.7)                  | 5 (1.7)         | 15 (10.0)      | 82 (4.8)       |
| Menopausal status                               |                                      |                      |                |                          |                           |                 |                |                |
| Post                                            | 147 (47.6)                           | 66 (72.5)            | 146 (50.0)     | 317 (58.3)               | 21 (61.8)                 | 131 (44.3)      | 79 (52.7)      | 907 (52.9)     |
| Pre                                             | 162 (52.4)                           | 25 (27.5)            | 146 (50.0)     | 218 (40.1)               | 13 (38.2)                 | 165 (55.7)      | 71 (47.3)      | 800 (46.6)     |
| NA <sup>F</sup>                                 | 0 (0.0)                              | 0 (0.0)              | 0 (0.0)        | 9 (1.6)                  | 0 (0.0)                   | 0 (0.0)         | 0 (0.0)        | 9 (0.5)        |

<sup>A</sup> Based on a score ranging from 0 (low) to 9 (high) was generated from the sum of 9 equally-weighted (+1 each) possessions: home ownership; indoor water; flush toilet; electricity; vehicle; refrigerator; landline phone; gas or electric stove; and a bed; <sup>B</sup> Three missing values in South Africa non-black women; <sup>C</sup> Usual place of residence was defined as urban (city/town) or rural (village/rural) in ABC-DO and, in Soweto, as residing <10 km or ≥10 km straight-line distance to the hospital; <sup>D</sup> HIV-status self-reported except of systematic patient testing in South Africa.

<sup>E</sup> The non-HIV comorbidities tuberculosis, hypertension, heart disease, anaemia, diabetes, COPD, hepatitis, asthma, other cancer and other infection were assessed one by one in ABC-DO and categorized, in line with the Soweto data, to perfect health (no comorbidity), minor problems (1 comorbidity) and major problems (>1 comorbidity); <sup>F</sup> Patient after hysterectomy;

**Supplementary Table 3: Tumour profile at presentation in non-metastatic women with known TNM stage information in the prospective African Breast Cancer-Disparities in Outcomes (ABC-DO) cohort, by patient group**

|                                      | Namibia<br>black | Namibia<br>non-black | Nigeria    | SA<br>black | SA<br>non-black | Uganda     | Zambia     | Total       |
|--------------------------------------|------------------|----------------------|------------|-------------|-----------------|------------|------------|-------------|
| N                                    | 309              | 91                   | 292        | 544         | 34              | 296        | 150        | 1716        |
| <b>Stage category<sup>A</sup></b>    | N (column %)     |                      |            |             |                 |            |            |             |
| Localised BC                         | 178 (57.6)       | 75 (82.4)            | 127 (43.5) | 344 (63.2)  | 26 (76.5)       | 191 (64.5) | 87 (58.0)  | 1028 (59.9) |
| Locally advanced BC                  | 131 (42.4)       | 16 (17.6)            | 165 (56.5) | 200 (36.8)  | 8 (23.5)        | 105 (35.5) | 63 (42.0)  | 688 (40.1)  |
| <b>Nodes<sup>B</sup></b>             |                  |                      |            |             |                 |            |            |             |
| N0 (0)                               | 38 (40.0)        | 24 (63.2)            | 58 (34.7)  | 107 (35.4)  | 7 (36.8)        | 52 (28.3)  | 27 (41.5)  | 313 (36.0)  |
| N1 (1-3)                             | 24 (25.3)        | 11 (28.9)            | 63 (37.7)  | 94 (31.1)   | 7 (36.8)        | 115 (62.5) | 24 (36.9)  | 338 (38.9)  |
| N2 (4-9)                             | 25 (26.3)        | 2 (5.3)              | 36 (21.6)  | 39 (12.9)   | 0 (0.0)         | 7 (3.8)    | 5 (7.7)    | 114 (13.1)  |
| N3 (10+)                             | 8 (8.4)          | 1 (2.6)              | 6 (3.6)    | 15 (5.0)    | 4 (21.1)        | 1 (0.5)    | 4 (6.2)    | 39 (4.5)    |
| missing                              | 0 (0.0)          | 0 (0.0)              | 4 (2.4)    | 47 (15.6)   | 1 (5.3)         | 9 (4.9)    | 5 (7.7)    | 66 (7.5)    |
| <b>Tumour Size</b>                   |                  |                      |            |             |                 |            |            |             |
| ≤ 2cm                                | 21 (6.8)         | 25 (27.5)            | 11 (3.8)   | 91 (16.7)   | 7 (20.6)        | 27 (9.1)   | 10 (6.7)   | 192 (11.1)  |
| 2- ≤ 5cm                             | 97 (31.4)        | 39 (42.9)            | 70 (24.0)  | 265 (48.7)  | 17 (50.0)       | 130 (43.9) | 49 (32.7)  | 667 (38.9)  |
| 5cm+                                 | 190 (61.5)       | 27 (29.6)            | 156 (53.4) | 112 (20.6)  | 6 (17.6)        | 102 (34.5) | 64 (42.6)  | 657 (38.3)  |
| missing                              | 1 (0.3)          | 0 (0.0)              | 55 (18.8)  | 76 (14.0)   | 4 (11.8)        | 37 (12.5)  | 27 (18.0)  | 200 (11.7)  |
| <b>Grade / Differentiation</b>       |                  |                      |            |             |                 |            |            |             |
| Well                                 | 46 (14.9)        | 24 (26.4)            | 6 (2.1)    | 36 (6.6)    | 1 (2.9)         | 59 (19.9)  | 13 (8.7)   | 185 (10.8)  |
| Moderately                           | 113 (36.6)       | 31 (34.1)            | 24 (8.2)   | 275 (50.6)  | 22 (64.7)       | 59 (19.9)  | 45 (30.0)  | 569 (33.2)  |
| Poorly                               | 67 (21.6)        | 22 (24.1)            | 3 (1.0)    | 217 (39.9)  | 11 (32.4)       | 64 (21.7)  | 25 (16.6)  | 409 (23.8)  |
| Unable to determine                  | 83 (26.9)        | 14 (15.4)            | 162 (55.5) | 0 (0.0)     | 0 (0.0)         | 111 (37.5) | 63 (42.0)  | 433 (25.2)  |
| Missing                              | 0 (0.0)          | 0 (0.0)              | 97 (33.2)  | 16 (2.9)    | 0 (0.0)         | 3 (1.0)    | 4 (2.7)    | 120 (7.0)   |
| <b>Hormone receptors</b>             |                  |                      |            |             |                 |            |            |             |
| Positive                             | 223 (72.2)       | 71 (78.0)            | 23 (7.9)   | 428 (78.7)  | 31 (91.2)       | 25 (8.4)   | 27 (18.0)  | 828 (48.2)  |
| Negative                             | 79 (25.5)        | 19 (20.9)            | 13 (4.5)   | 114 (21.0)  | 3 (8.8)         | 13 (4.4)   | 16 (10.7)  | 257 (15.0)  |
| Unknown                              | 7 (2.3)          | 1 (1.1)              | 256 (87.6) | 2 (0.3)     | 0 (0.0)         | 258 (87.2) | 107 (71.3) | 631 (36.8)  |
| <b>HER2</b>                          |                  |                      |            |             |                 |            |            |             |
| Negative                             | 199 (64.4)       | 70 (76.9)            | 35 (12.0)  | 302 (55.5)  | 23 (67.6)       | 30 (10.2)  | 33 (22.0)  | 692 (40.4)  |
| Positive                             | 99 (32.0)        | 18 (19.8)            | 4 (1.4)    | 118 (21.7)  | 7 (20.6)        | 6 (2.0)    | 6 (4.0)    | 258 (15.0)  |
| missing                              | 11 (3.6)         | 3 (3.3)              | 253 (86.6) | 124 (22.8)  | 4 (11.8)        | 260 (87.8) | 111 (74.0) | 766 (44.6)  |
| <b>Molecular subtype<sup>C</sup></b> |                  |                      |            |             |                 |            |            |             |
| HR+/HER-                             | 147 (47.6)       | 55 (60.4)            | 20 (6.8)   | 301 (55.4)  | 23 (67.6)       | 20 (6.8)   | 23 (15.3)  | 589 (34.3)  |
| HR+/HER+                             | 74 (23.9)        | 14 (15.4)            | 3 (1.0)    | 114 (21.0)  | 8 (23.6)        | 3 (1.0)    | 3 (2.0)    | 219 (12.8)  |
| HR-/HER2+                            | 25 (8.1)         | 4 (4.4)              | 1 (0.3)    | 23 (4.2)    | 0 (0.0)         | 3 (1.0)    | 3 (2.0)    | 59 (3.4)    |
| HR-/HER-                             | 50 (16.2)        | 15 (16.5)            | 10 (3.4)   | 90 (16.5)   | 3 (8.8)         | 10 (3.4)   | 10 (6.7)   | 188 (11.0)  |
| unknown                              | 13 (4.2)         | 3 (3.3)              | 258 (88.5) | 16 (2.9)    | 0 (0.0)         | 260 (87.8) | 111 (74.0) | 661 (38.5)  |

<sup>A</sup> Dichotomized variable derived from tumour size, nodes and metastases to assess correlation with the NCCN guidelines. Localized T1-3,N0-1,M0 vs locally advanced/inoperable tumours T4,N2-3,M0;

<sup>B</sup> Only reported for women not receiving neo-adjuvant treatment.

<sup>C</sup> IHC testing was only routinely done in Namibia and South Africa. Information on IHC determined oestrogen (ER), progesterone (PR) and human epidermal growth factor 2 receptors (HER2) were extracted, the latter with florescent in-situ hybridization (FISH) for equivocal results. ER and PR were considered positive with >1% staining, and HER2+ if FISH was positive or the HER2 score was 3.

**Supplementary Table 4: TNM staging and ascertainment of T, N and M in patients diagnosed with non-metastatic disease in the ABC-DO cohort**

|                                        | Namibia<br>black | Namibia<br>non-<br>black | Nigeria  | South<br>Africa<br>black | South<br>Africa<br>mixed-<br>race | Uganda   | Zambia   | Total     |
|----------------------------------------|------------------|--------------------------|----------|--------------------------|-----------------------------------|----------|----------|-----------|
| N                                      | 309              | 91                       | 292      | 544                      | 34                                | 296      | 150      | 1716      |
|                                        | N (column %)     |                          |          |                          |                                   |          |          |           |
| TNM Stage                              |                  |                          |          |                          |                                   |          |          |           |
| I (T1N0M0, T0N1M0)                     | 17 (6)           | 22 (24)                  | 11 (4)   | 28 (5)                   | 2 (6)                             | 35 (12)  | 4 (3)    | 119 (7)   |
| IIA (T0N1M0, T1N1M0, T2N0M0)           | 52 (17)          | 26 (29)                  | 28 (10)  | 131 (24)                 | 11 (32)                           | 58 (20)  | 18 (12)  | 324 (19)  |
| IIB (T2N1M0, T3N0M0)                   | 64 (21)          | 25 (28)                  | 50 (17)  | 138 (25)                 | 9 (27)                            | 49 (17)  | 50 (33)  | 385 (22)  |
| IIIA (T0/T1/T2 N2M0, T3 N1/N2 M0)      | 84 (27)          | 6 (7)                    | 66 (23)  | 96 (18)                  | 6 (18)                            | 54 (18)  | 19 (13)  | 331 (19)  |
| IIIB (T4 N0/N1/N2 M0)                  | 62 (20)          | 8 (9)                    | 125 (43) | 131 (24)                 | 6 (18)                            | 83 (28)  | 47 (31)  | 462 (27)  |
| IIIC (T1-T4 N3 M0)                     | 30 (10)          | 4 (4)                    | 12 (4)   | 20 (4)                   | 0 (0)                             | 17 (6)   | 12 (8)   | 95 (6)    |
| Ascertainment: Tumour size             |                  |                          |          |                          |                                   |          |          |           |
| Clinical with imaging <sup>A</sup>     | 41 (13)          | 35 (39)                  | 101 (35) | 0 (0)                    | 0 (0)                             | 241 (81) | 102 (68) | 520 (30)  |
| Clinical, detailed imaging unknown     | 176 (57)         | 25 (28)                  | 180 (62) | 544 (100)                | 34 (100)                          | 41 (14)  | 24 (16)  | 1024 (60) |
| Pathological                           | 91 (29)          | 31 (34)                  | 6 (2)    | 0 (0)                    | 0 (0)                             | 4 (1)    | 6 (4)    | 138 (8)   |
| Unknown/not assessed                   | 1 (0)            | 0 (0)                    | 5 (2)    | 0 (0)                    | 0 (0)                             | 10 (3)   | 18 (12)  | 34 (2)    |
| Ascertainment: Nodes                   |                  |                          |          |                          |                                   |          |          |           |
| Clinical with imaging <sup>A</sup>     | 42 (14)          | 47 (52)                  | 97 (33)  | 0 (0)                    | 0 (0)                             | 214 (72) | 97 (65)  | 497 (29)  |
| Clinical, detailed imaging unknown     | 197 (64)         | 26 (29)                  | 190 (65) | 544 (100)                | 34 (100)                          | 69 (23)  | 28 (19)  | 1088 (63) |
| Pathological                           | 70 (23)          | 18 (20)                  | 0 (0)    | 0 (0)                    | 0 (0)                             | 7 (2)    | 4 (3)    | 99 (6)    |
| Unknown/ not assessed                  | 0 (0)            | 0 (0)                    | 5 (2)    | 0 (0)                    | 0 (0)                             | 6 (2)    | 21 (14)  | 32 (2)    |
| Methods of ascertainment of metastases |                  |                          |          |                          |                                   |          |          |           |
| Imaging <sup>B</sup>                   | 282 (91)         | 84 (92)                  | 103 (35) | 544 (100)                | 34 (100)                          | 146 (49) | 108 (72) | 1301 (76) |
| Clinically/Unknown                     | 27 (9)           | 7 (8)                    | 189 (65) | 0 (0)                    | 0 (0)                             | 150 (51) | 42 (28)  | 415 (24)  |

<sup>A</sup> Mostly ultrasound and/or Mammography

<sup>B</sup> Mostly ultrasound and/or Xray, additional CT scans in South Africa

**Supplementary Table 5:** Details of breast cancer surgical management in ABC-DO for patients receiving breast cancer surgery separately for localised tumours vs locally advanced tumours.

| Group                                    | Namibia black | Namibia non-black | Nigeria      | South Africa black | South Africa mixed-race | Uganda       | Zambia      | Total          |
|------------------------------------------|---------------|-------------------|--------------|--------------------|-------------------------|--------------|-------------|----------------|
| No. women.                               | 309           | 91                | 292          | 544                | 34                      | 296          | 150         | 1716           |
|                                          | N (column %)  |                   |              |                    |                         |              |             |                |
| <b>Localised BC<sup>A</sup></b>          | 178/309 (58)  | 75/91 (82)        | 127/292 (43) | 344/544 (63)       | 26/34 (76)              | 191/296 (65) | 87/150 (58) | 1028/1716 (60) |
| Surgery performed                        | 144/178 (81)  | 69/75 (92%)       | 83/127 (65)  | 311/344 (90)       | 24/26 (92)              | 127/191 (66) | 58/87 (67)  | 816/1028 (80)  |
| Type                                     |               |                   |              |                    |                         |              |             |                |
| Mastectomy                               | 129/144 (90)  | 54/69 (78)        | 39/83 (47)   | 215/311 (69)       | 14/24 (58)              | 117/127 (92) | 56/58 (97)  | 624/816 (77)   |
| Of these, radiotherapy                   | 98/129 (76)   | 33/54 (61)        | 4/39 (10)    | 77/215 (36)        | 9/14 (64)               | 37/117 (32)  | 26/56 (46)  | 426/624 (47)   |
| Breast Conserving Surgery (BCS)          | 15/144 (10)   | 15/69 (22)        | 44/83 (53)   | 96/311 (31)        | 10/24 (42)              | 10/127 (8)   | 2/58 (3)    | 192/816 (24)   |
| Of BCS, radiotherapy initiated           | 13/15 (87)    | 14/15 (93)        | 2/44 (5)     | 51/96 (53)         | 6/10 (60)               | 4/10 (40)    | 0/2 (0)     | 90/192 (47)    |
| Lymph node dissection                    |               |                   |              |                    |                         |              |             |                |
| Not done                                 | 9/144 (6)     | 0/69 (0)          | 2/83 (2)     | 3/311 (1)          | 0/24 (0)                | 17/127 (13)  | 1/58 (2)    | 32/816 (4)     |
| Sentinel or sampling                     | 18/144 (13)   | 14/69 (20)        | 3/83 (4)     | 0/311 (0)          | 0/24 (0)                | 0/127 (0)    | 0/58 (0)    | 35/816 (4)     |
| Complete axillary dissection             | 25/144 (17)   | 7/69 (10)         | 4/83 (5)     | 278/311 (89)       | 23/24 (96)              | 3/127 (2)    | 2/58 (3)    | 342/816 (42)   |
| unknown                                  | 92/144 (64)   | 48/69 (70)        | 74/83 (89)   | 30/311 (10)        | 1/24 (4)                | 107/127 (84) | 55/58 (95)  | 407/816 (50)   |
| Additional systemic therapy <sup>B</sup> |               |                   |              |                    |                         |              |             |                |
| neoadjuvant                              | 89/144 (62)   | 35/69 (51)        | 26/83 (31)   | 63/311 (20)        | 6/24 (25)               | 13/127 (10)  | 27/58 (47)  | 475/816 (41)   |
| adjuvant                                 | 95/144 (66)   | 52/69 (75)        | 43/83 (52)   | 268/311 (86)       | 21/24 (88)              | 117/127 (92) | 37/58 (64)  | 851/816 (73)   |
| None                                     | 3/144 (2)     | 2/69 (3)          | 25/83 (30)   | 14/311 (5)         | 1/24 (4)                | 8/127 (6)    | 7/58 (12)   | 60/816 (7)     |
| <b>Locally advanced<sup>A</sup></b>      | 131/309 (42)  | 16/91 (18)        | 165/292 (57) | 200/544 (37)       | 8/34 (24)               | 106/296 (35) | 63/150 (42) | 689/1716 (40)  |
| Surgery performed                        | 77/131 (59)   | 13/16 (81)        | 73/165 (44)  | 105/200 (53)       | 4/8 (50)                | 55/106 (52)  | 21/63 (33)  | 348/689 (51)   |
| Type                                     |               |                   |              |                    |                         |              |             |                |
| Mastectomy                               | 76/77 (99)    | 12/13 (92)        | 41/73 (56)   | 82/105 (78)        | 4/4 (100)               | 50/55 (91)   | 20/21 (95)  | 285/348 (82)   |
| Of these, radiotherapy                   | 62/76 (82)    | 10/12 (83)        | 3/41 (7)     | 50/82 (61)         | 3/4 (75)                | 8/50 (16)    | 6/20 (30)   | 0/285 (0)      |
| BCS                                      | 1/77 (1)      | 1/13 (8)          | 32/73 (44)   | 23/105 (22)        | 0/4 (0)                 | 5/55 (9)     | 1/21 (5)    | 63/348 (18)    |
| Of BCS, radiotherapy initiated           | 0/1 (0)       | 1/1 (100)         | 0/32 (0)     | 16/23 (70)         | 0/0 (0)                 | 0/5 (0)      | 0/1 (0)     | 17/63 (27)     |
| Lymph node dissection                    |               |                   |              |                    |                         |              |             |                |
| Not done                                 | 2/77 (3)      | 0/13 (0)          | 2/73 (3)     | 3/105 (3)          | 0/4 (0)                 | 6/55 (11)    | 0/21 (0)    | 13/348 (4)     |
| Sentinel or sampling                     | 8/77 (10)     | 1/13 (8)          | 0/73 (0)     | 0/105 (0)          | 0/4 (0)                 | 0/55 (0)     | 0/21 (0)    | 9/348 (3)      |
| Complete axillary dissection             | 15/77 (19)    | 4/13 (31)         | 2/73 (3)     | 84/105 (80)        | 3/4 (75)                | 5/55 (9)     | 2/21 (10)   | 115/348 (33)   |
| unknown                                  | 52/77 (68)    | 8/13 (62)         | 69/73 (95)   | 18/105 (17)        | 1/4 (25)                | 44/55 (80)   | 19/21 (90)  | 211/348 (61)   |
| Additional systemic therapy <sup>C</sup> |               |                   |              |                    |                         |              |             |                |
| neoadjuvant                              | 43/77 (56)    | 10/13 (77)        | 43/73 (59)   | 94/105 (90)        | 3/4 (75)                | 10/55 (18)   | 13/21 (62)  | 216/348 (62)   |
| adjuvant                                 | 48/77 (62)    | 9/13 (69)         | 33/73 (45)   | 64/105 (61)        | 4/4 (100)               | 50/55 (91)   | 10/21 (48)  | 218/348 (63)   |
| none                                     | 3/77 (4)      | 0/13 (0)          | 10/73 (14)   | 6/105 (6)          | 0/4 (0)                 | 4/55 (7)     | 2/21 (10)   | 25/348 (7)     |

<sup>A</sup> Dichotomized variable derived from tumour size, nodes and metastases to assess correlation with the NCCN guidelines. Localized T1-3,N0-1,M0 vs locally advanced/inoperable tumours T4,N2-3,M0.

<sup>B</sup> Column percentage >100% due to 136 women receiving neoadjuvant and adjuvant systemic therapy

<sup>C</sup> Column percentage >100% due to 111 women receiving neoadjuvant and adjuvant systemic therapy

**Supplementary Figure 1:** Venn diagrams of treatment initiated in the ABC-DO cohort for women presenting with localised (A) vs locally advanced (B) tumours.

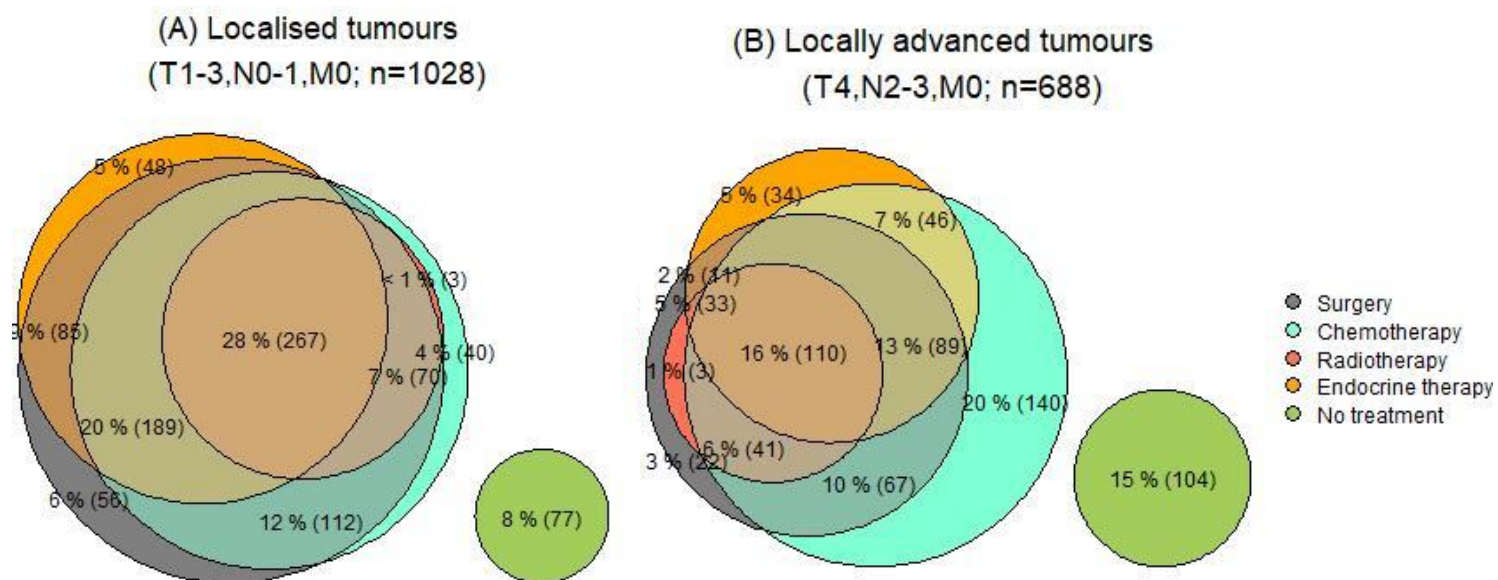

**Supplementary Figure 1, Input data**

|                                                         | <b>Localised tumours (T1-3, N0-1, M0)</b> | <b>Locally advanced tumours (T4, N2-3, M0)</b> |
|---------------------------------------------------------|-------------------------------------------|------------------------------------------------|
| <b>Treatment combination, Total number of women</b>     | <b>1028</b>                               | <b>688</b>                                     |
|                                                         | <b>N (column %)</b>                       | <b>N (column %)</b>                            |
| No treatment                                            | 77 (7)                                    | 104 (15)                                       |
| Surgery alone                                           | 56 (5)                                    | 22 (3)                                         |
| Surgery & Chemotherapy                                  | 112 (11)                                  | 67 (10)                                        |
| Surgery & endocrine therapy                             | 85 (8)                                    | 11 (2)                                         |
| Surgery, chemotherapy & endocrine therapy               | 189 (18)                                  | 89 (13)                                        |
| Surgery & radiotherapy                                  | 4 (0)                                     | 3 (0)                                          |
| Chemotherapy alone                                      | 40 (4)                                    | 140 (20)                                       |
| Endocrine therapy alone                                 | 48 (5)                                    | 34 (5)                                         |
| Chemotherapy and endocrine therapy                      | 27 (3)                                    | 46 (7)                                         |
| Chemotherapy & radiotherapy                             | 3 (0)                                     | 3 (0)                                          |
| Endocrine therapy & radiotherapy                        | 2 (0)                                     | 0 (0)                                          |
| Chemotherapy, endocrine therapy & radiotherapy          | 15 (1)                                    | 13 (2)                                         |
| Surgery, chemotherapy and radiotherapy                  | 70 (7)                                    | 41 (6)                                         |
| Surgery, endocrine therapy and radiotherapy             | 33 (3)                                    | 5 (1)                                          |
| Surgery, chemotherapy, endocrine therapy & radiotherapy | 267 (26)                                  | 110 (16)                                       |



**Supplementary Figure 2 A-C.** Percentage of treatment indicated versus received for women with non-metastatic BC per population group in the ABC-DO cohort. The dominator of all bar heights is the N per population group. Percentages in brackets on the labels of lower bars correspond to the percentage of women initiating treatment amongst all eligible/indicated (the higher bar).

A) Surgery

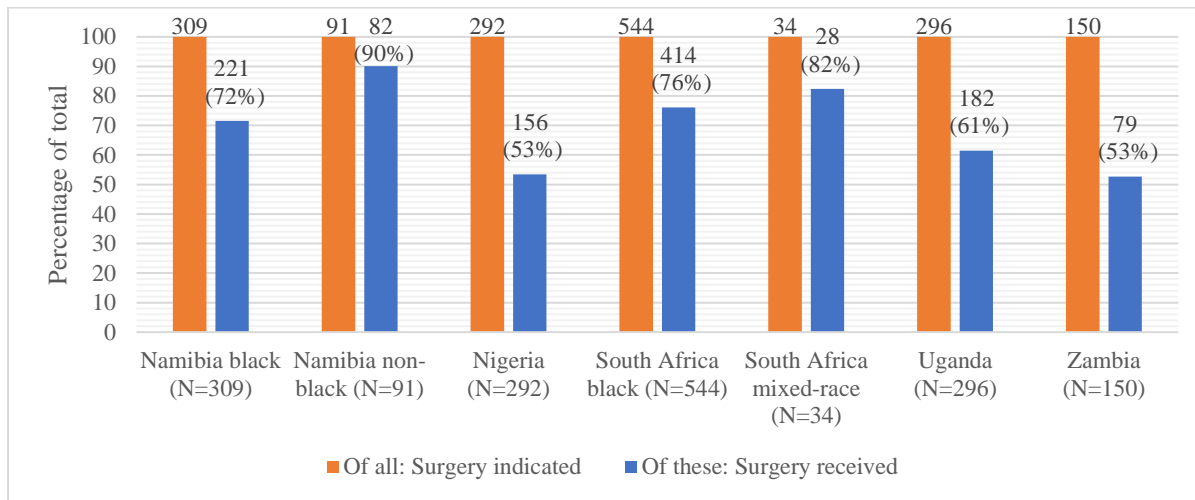

B) Chemotherapy

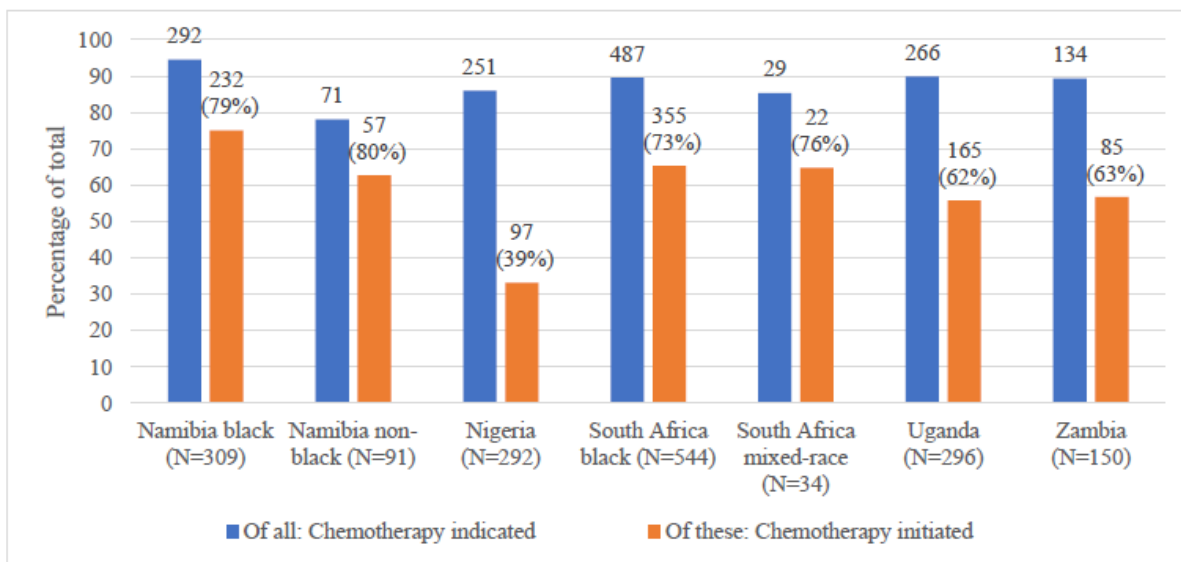

C) Endocrine Therapy

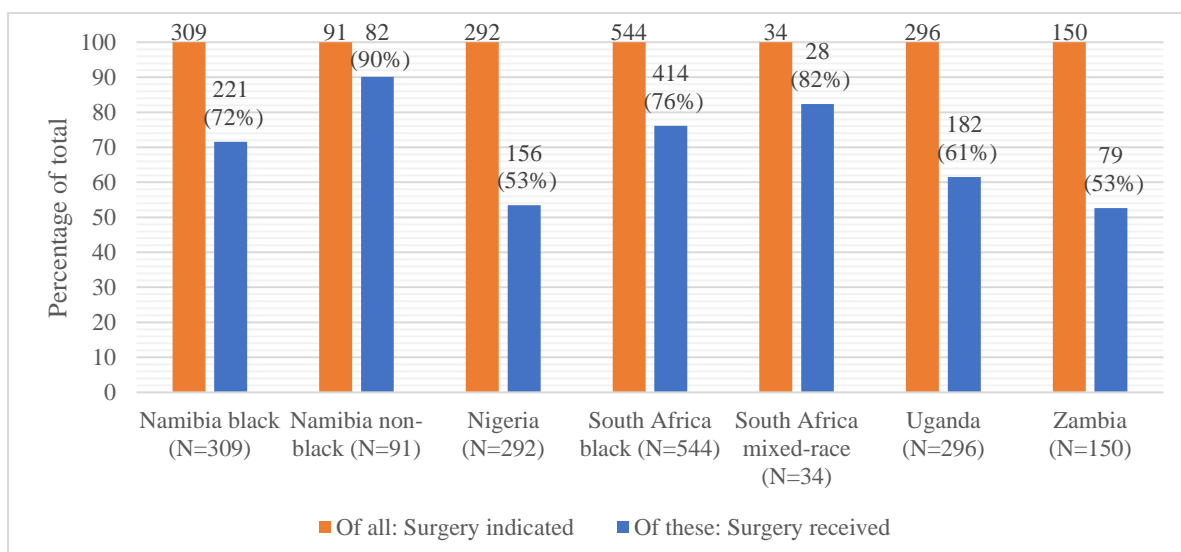

**Supplementary Figure 3:** Breast cancer treatment timeline for 15 randomly selected women in each population group. (Zam: Zambia; Uga: Uganda; SA mr: South Africa mixed-race; SA bl: South Africa black; Nam nbl: Namibia non-black; Nam bl: Namibia black)

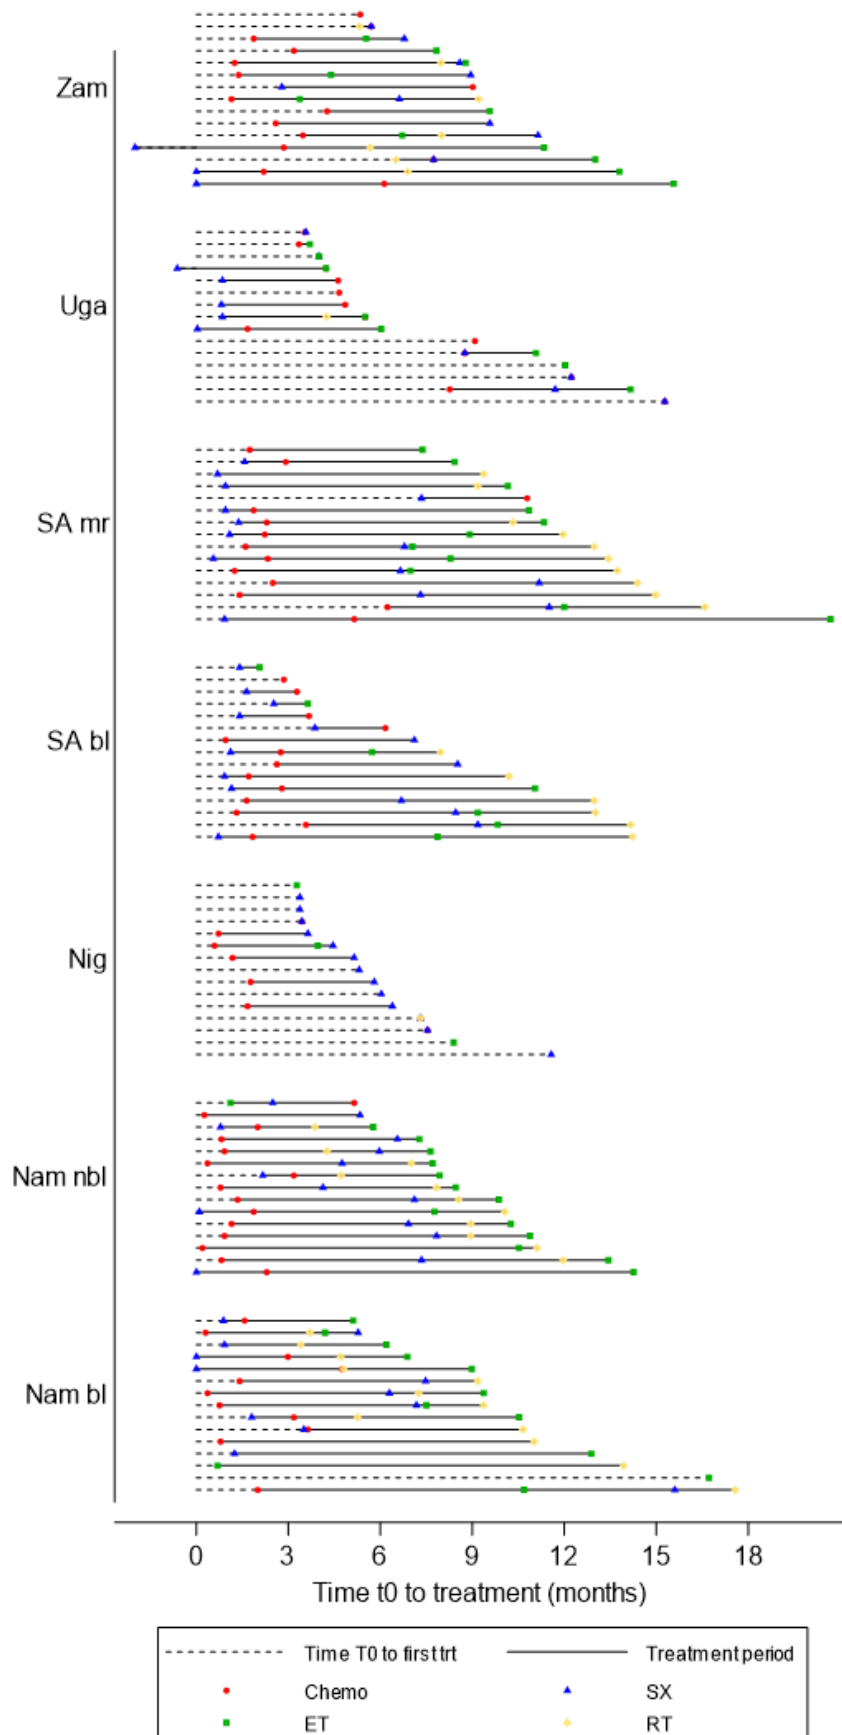

Supplement: NIHMS1880679-supplement-Supplementary.pdf [file NIHMS1880679-supplement-Supplementary.pdf]
